# Supplementary material
Source: publisher site journal article supplement (https://www.dovepress.com/get_supplementary_file.php?f=300818.docx)
Supplement: Supplementary file 1 [file get_supplementary_file.php]

**Supplementary material S1**

**S1 text: *Artiﬁcial Neural Networks Analysis***

The Auto-Contractive Map (Auto-CM for short) was born as a new Artificial Neural Network. It was designed by Massimo Buscema at the Semeion Research Center 3. The Auto-CM system finds, by a specific learning algorithm, a square matrix of weighted connections among the variables of any dataset. This matrix of connections presents many suitable features: a) no-linear associations among variables are preserved; b) connections schemes among clusters of variables are captured, and c) complex similarities among variables become evident. Once an Auto-CM weights matrix is obtained it is then filtered by a minimum spanning tree algorithm (MST) generating a graph whose biological evidence has already been tested in the medical field4,56. The MST algorithm, described by Kruskal's with a specific deterministic algorithm7 however, is still rarely used in the medical field. Auto-CM has been developed to explore the concomitant associations of different variables, and the potential relationships among variables in a multi-factor network relevant for the disease. The ultimate goal of this data mining model is to discover hidden trends and associations among variables, since this algorithm is able to create a semantic connectivity map in which no linear associations are preserved, and explicit connection schemes are described. This approach shows the map of relevant connections between and among variables and the principal hubs of the system. Hubs can be defined as variables with the maximum amount of connections in the map. From mathematical point of view the specificity of Auto-CM algorithm is to minimize a complex cost function with respect to the traditional ones.

Traditional minimization cost function:

Auto-CM minimization cost function:

Comparing the two cost functions it is evident how the traditional minimization includes only second order effects, while the Auto-CM considers also a third order effect. Practically, this means that the Auto-CM algorithm is able to discover variable similarities completely embedded in the dataset and invisible to the other classical tools. This approach describes a context which is typical of living systems where a continuous time dependent complex change in the variable value is present. Auto-CM can also learn under difficult circumstances such as when the connections of the main diagonal of the second connections matrix are removed. When the learning process is organized in this way, Auto-CM identifies specific relationships between each variable and all others. Consequently, from an experimental point of view, it appears that the ranking of its connection matrix is equal to the ranking of the joint probability between each variable and the others. Auto-CM requires a training phase necessary to learn how variables are interconnected. The learning algorithm of CM may be summarized in four orderly steps: a) Signal Transfer from the Input into the Hidden layer; b) Adaptation of the connections value between the Input layer and the Hidden layer; c) Signal Transfer from the Hidden layer into the Output layer; d) Adaptation of the connections value between the Hidden layer and the Output layer.

Based on the minimum spanning tree theory, the Auto-CM reveals the connections among variables providing a graph in which the distances among variables reflect their bonding strength (weights). This approach provides the map of relevant connections between and among variables and the principal hubs of the system. Hubs can be defined as variables with the maximum amount of connections in the map. The Auto-CM does not pose randomly the initial weights. Conversely, the Auto-CM starts with the same value. Thus, the resulting graph is reproducible along many runs.

On other words, the Auto-CM ‘spatializes’ the correlation among the variables (‘closeness’) and the graph identifies only the relevant associations organizing them into a coherent picture. The “central node” is the inner node that remains after bottom-up recursively pruning away the “leaves” nodes.

The MST represents what we could call the ‘nervous system’ of any dataset. In fact, summing up all of the connection strengths among all the variables, we get the total energy of that system. The MST selects only the connections that minimize this energy, i.e., the only ones that are necessary to keep the system coherent. Consequently, all the links included in the MST are fundamental, but, on the contrary, not every ‘fundamental’ link of the dataset need be in the MST. Such limit is intrinsic to the nature of MST itself: every link that gives rise to a cycle into the graph (viz., that destroys the graph’s ‘treeness’) is eliminated, whatever its strength and meaningfulness. To fix this shortcoming and to better capture the intrinsic complexity of a dataset, it is necessary to add more links to the MST, according to two criteria: (1) the new links have to be relevant from a quantitative point of view; (2) the new links have to be able to generate new cyclic regular microstructures, from a qualitative point of view. The additional links superimposed to MST graph generate a Maximally Regular Graph

The Maximally Regular Graph (MRG) the graph whose hubness function attains the highest value among all the graphs generated by adding back to the original MST, one by one, the missing connections previously skipped during the computation of the MST itself. In other words, The MRG, generates, starting from the MST, the graph presenting the highest number of regular microstructures highlighting the most important connections of the dataset. The resulting “diamond” expresses the complexity core of the system and in our specific case, the core of the syndrome.

references

1. Berry RB, Brooks R, Gamaldo C, et al. AASM scoring manual updates for 2017 (version 2.4). *J Clin Sleep Med*. 2017;13(5):665-666. doi:10.5664/jcsm.6576

2. Marcus CL, Traylor J, Gallagher PR, et al. Prevalence of periodic limb movements during sleep in normal children. *Sleep*. 2014;37(8):1349-1352. doi:10.5665/sleep.3928

3. Buscema M, Sacco PL. Digging deeper on “deep” learning: A computational ecology approach. *Behav Brain Sci*. 2017;40:e256. doi:10.1017/S0140525X1700005X

4. Buscema M, Grossi E, Snowdon D, Antuono P. Auto-Contractive Maps: an artificial adaptive system for data mining. An application to Alzheimer disease. *Curr Alzheimer Res*. 2008;5(5):481-498. doi:10.2174/156720508785908928

5. Buscema M, Grossi E. The semantic connectivity map: an adapting self-organising knowledge discovery method in data bases. Experience in gastro-oesophageal reflux disease. *Int J Data Min Bioinform*. 2008;2(4):362-404. doi:10.1504/ijdmb.2008.022159

6. Licastro F, Porcellini E, Chiappelli M, et al. Multivariable network associated with cognitive decline and dementia. *Neurobiol Aging*. 2010;31(2):257-269. doi:10.1016/j.neurobiolaging.2008.03.019

7. JB K. On the shortest spanning subtree of a graph and the traveling salesman problem. *J Am Math Soc*. 1956;7:48-50.
